# Activity-mediated accumulation of potassium induces a switch in firing pattern and neuronal excitability type

Susana Andrea Contreras<sup>1,2</sup>, Jan-Hendrik Schleimer<sup>1,2</sup>, Allan T. Gullledge<sup>3</sup>, Susanne Schreiber<sup>\*1,2</sup>

**1** Institute for Theoretical Biology, Humboldt-University of Berlin

**2** Bernstein Center for Computational Neuroscience Berlin

**3** Molecular and Systems Biology, Geisel School of Medicine at Dartmouth College

✉ Current Address: Humboldt-University of Berlin, Institute for Theoretical Biology, Berlin, Germany

\* [s.schreiber@rz.hu-berlin.de](mailto:s.schreiber@rz.hu-berlin.de)

## Abstract

During normal neuronal activity, ionic concentration gradients across a neuron's membrane are often assumed to be stable. Prolonged spiking activity, however, can reduce transmembrane gradients and affect voltage dynamics. Based on mathematical modeling, we here investigate the impact of neuronal activity on ionic concentrations and, consequently, the dynamics of action potential generation. We find that intense spiking activity on the order of a second suffices to induce changes in ionic reversal potentials and to consistently induce a switch from a regular to an intermittent firing mode. This transition is caused by a qualitative alteration in the system's voltage dynamics, mathematically corresponding to a co-dimension-two bifurcation from a saddle-node on invariant cycle (SNIC) to a homoclinic orbit bifurcation (HOM). Our electrophysiological recordings in mouse cortical pyramidal neurons confirm the changes in action potential dynamics predicted by the models: (i) activity-dependent increases in intracellular sodium concentration directly reduce action potential amplitudes, an effect that previously had been attributed solely to sodium channel inactivation; (ii) extracellular potassium accumulation switches action potential generation from tonic firing to intermittently interrupted output. Individual neurons thus may respond very differently to the same input stimuli, depending on their recent patterns of activity or the current brain-state.

## Author summary

Ionic concentrations in the brain are not constant. We show that during intense neuronal activity, they can change on the order of seconds and even switch neuronal spiking patterns under identical stimulation from a regular firing mode to an intermittently interrupted one. Triggered by an accumulation of extracellular potassium, such a transition is caused by a specific, qualitative change in of the neuronal voltage dynamics – a so-called bifurcation – which affects crucial features of action-potential generation and bears consequences for how information is encoded and how neurons behave together in the network. Also changes in intracellular sodium can induce measurable effects, like a shrinkage of spike amplitude that occurs independently of the fast amplitude-effects attributed to sodium channel inactivation. Taken together, our results demonstrate that a neuron can respond very differently to the same stimulus, depending on its previous activity or the current brain state. The finding is particularly relevant when other regulatory mechanisms of ionic homeostasis are challenged, for example, during pathological states of glial impairment or oxygen deprivation. Categorization of cortical neurons as intrinsically bursting or regular spiking may be biased by the ionic concentrations at the time of the observation, highlighting the non-static nature of neuronal dynamics.

## Introduction

Ever since the introduction of Hodgkin-Huxley’s famous neuron model for the squid giant axon, the governing equations have been a useful tool to understand the mechanisms of spike generation. The original model assumed fixed ionic concentrations inside and outside the cell, establishing constant driving forces for ionic flux otherwise modulated only by the channels’ gating kinetics [1]. In the brain, however, ionic concentrations are not constant, and the ionic composition of the extracellular space varies with behavioral states [2,3] and as a function of neuronal activity [4,5].

The concentrations of sodium  $[\text{Na}^+]$  and potassium  $[\text{K}^+]$  ions – the two ionic species essential for sodium action potentials – are known to vary in response to neuronal activity *in vitro* and *in vivo* at relatively slow timescales (on the order of seconds). Intracellular sodium concentration has been found to increase with activity in mammalian pyramidal neurons responding to physiologically relevant stimuli (on the order of 3-10 seconds) [5]. For example, in cat neocortex, the concentration of extracellular potassium can oscillate in correlation with local field potentials (LFPs) during slow

wave ( $\sim 1$  Hz) sleep [3] or when presenting oscillating graded stimuli to the cat's retina on the order of seconds [4]. Nevertheless, how stimulus-induced changes in ionic concentration gradients impact ongoing neuronal activity is currently not well understood.

In this study, we use conductance-based models to predict and experimentally test how changes in transmembrane ionic concentration gradients that arise during periods of increased neuronal activity impact action-potential generation. We find that prolonged stimulation ( $\sim 10$  seconds) can generate ionic concentration changes substantial enough to modify action potential generation in neurons. Intracellular sodium accumulation, in particular, alters action-potential amplitude on slow timescales matching the ionic changes – an effect previously primarily attributed to the inactivation of sodium channels [6–8].

Extracellular potassium accumulation, in turn, can qualitatively switch the spike-generating mechanism, thus changing fundamental properties of firing patterns, encoding, and network behaviour. Mathematically, the transition corresponds to a so-called co-dimension-two bifurcation, at which the spike generating mechanism changes qualitatively from a regular saddle-node on invariant cycle (SNIC), when extracellular potassium concentrations are low, to a homoclinic orbit bifurcation (HOM), when extracellular potassium concentrations become high. The switch in the firing regime most notably results in a transition from regular spiking to a burst-like, intermittently interrupted firing mode in the HOM regime, caused by a so-called bistability of the dynamical system. In the HOM regime, the options of a fixed, resting-like voltage state and regular firing co-exist for the same input levels, resulting in stimulus- and noise-induced switches between both states.

Prolonged electrical activity can, therefore, have significant effects on spiking patterns and neuronal dynamics. We uncover these properties by, first, dissecting both potassium ion and sodium ion contributions to spike generation and, second, testing predictions in *in vitro* electrophysiological recordings.

## Results

### Model response to prolonged stimuli

In order to analyze how neurons respond to prolonged stimulation, we examined the temporal evolution of activity-dependent changes in transmembrane ionic gradients and assessed their impact on ongoing neuronal activity. To this end, we implemented a single-neuron, conductance-based

model including dynamic ion concentrations (detailed in Methods). Ionic gradients determine the equilibrium (Nernst) potentials that, in turn, influence the driving forces of spike-generating ionic currents. Accumulation of ions over time, consequently, modifies the Nernst potentials as well as the spike generating currents and, therefore, also spike generation. A regulation of concentration gradients ( $[\text{Na}^+]$  and  $[\text{K}^+]$ ) is mediated by the Na-K-ATPase pump: an electrogenic active-transporter whose activity intensifies when  $[\text{Na}^+]_i$  accumulates. Due to its electrogenic nature (changing the net charges across the membrane), activity of the Na-K-ATPase pump affects the membrane potential.

### Noise-free analysis

First, we investigated the response of the model to a step input current - a typical protocol in patch-clamp experiments. Stimulation of the model for almost 10 seconds (Fig. 1A) led to an accumulation of intracellular sodium,  $[\text{Na}^+]_i$ , as well as an increase in extracellular potassium,  $[\text{K}^+]_o$  (Fig. 1B). The concentration changes resulted from the prolonged spiking activity and were indeed substantial enough to alter features of the generated action potentials during the duration of the stimulation protocol. Three major changes that have often been reported in experiments were observed in the model: (a) the emergence of a slow after-hyperpolarization (AHP), (b) adaptation (i.e., a reduction) of spike frequency, and (c) reduction of spike amplitudes (Fig. 1A).

a) The slow AHP became visible when the stimulus was set back to baseline and neuronal spiking stopped (Fig. 1A). The slow AHP resulted from the hyperpolarising Na-K-ATPase pump current: Na-K-ATPase pump activity was enhanced with the action-potential-driven rise in intracellular sodium concentration, because  $[\text{Na}^+]_i$  accumulation, increases the pump activity. When the stimulation ended, the neuron stopped firing and the membrane potential hyperpolarized with respect to the original resting membrane potential (due to the transient change in the Na-K-ATPase pump current). As ongoing Na-K-ATPase activity progressively lowered the intracellular sodium concentration back to baseline levels, the hyperpolarization slowly diminished (Fig. 1A).

b) Spike frequency adaptation, evident in Fig. 1A, also resulted from the activity-dependent increase in Na-K-ATPase current, which effectively reduced the net excitatory drive of the neuron. The model does not contain adaptation currents besides the Na-K-ATPase pump (*e.g.*, M-currents). Note that the pump current used in the model is only sensitive to  $\text{Na}^+$ , which idealizes the pump  $\alpha 3$  isoform of the Na-K-ATPase. The pump  $\alpha 3$  isoform is negligibly sensitive to  $\text{K}^+$  and  $\text{V}$ , but highly sensitive to changes in intracellular sodium concentration over the ranges simulated in this

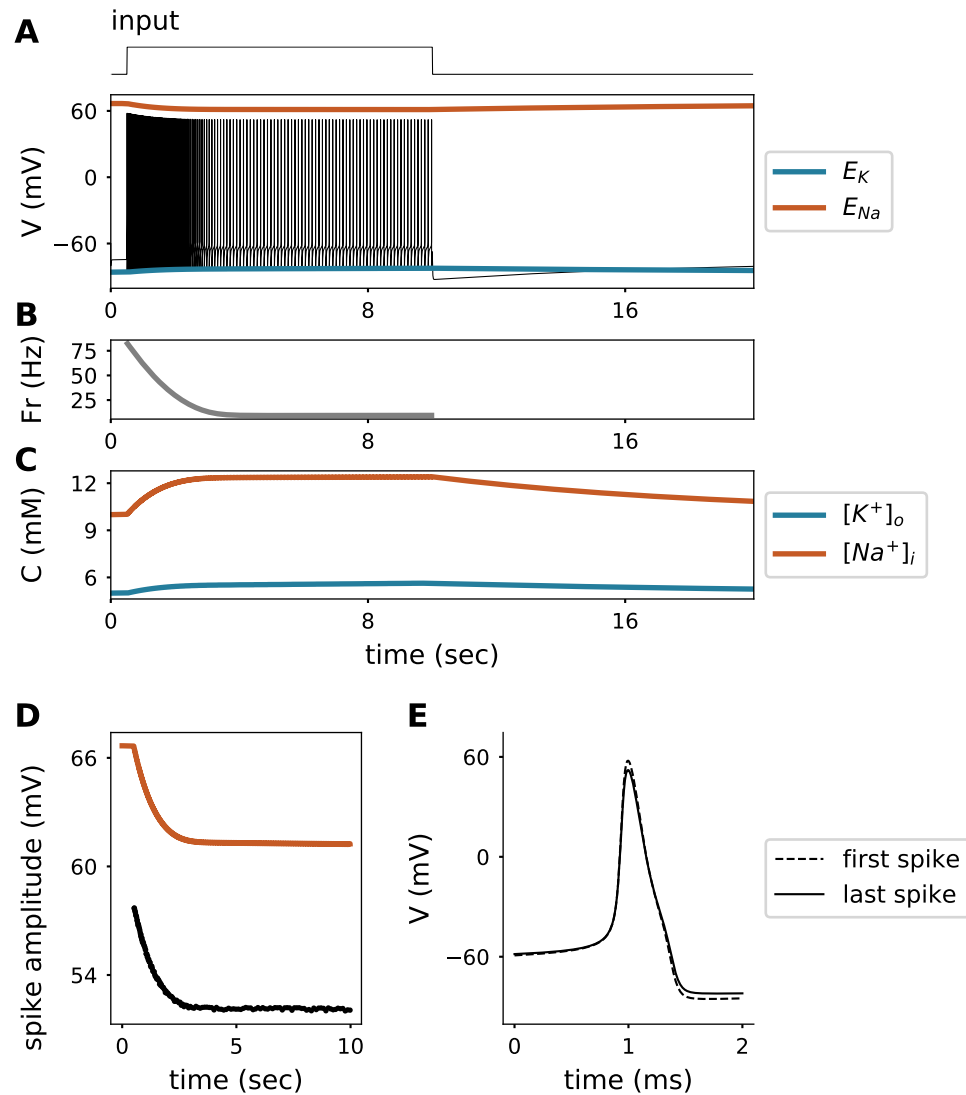

**Fig 1. Response of the model to a step current of  $2\mu A/cm^2$  input as shown in the top.** **A.** Voltage trace (V) with reversal potentials for sodium (Orange) and potassium (Blue). **B.** Firing rate (Fr) of neuron model. **C.** Intracellular sodium (Orange) and extracellular potassium (Blue) concentration (C) dynamics. **D.** Spike amplitude and reversal potential for sodium (Orange) for the trace shown in **A.** **E.** First and last spike (peaks aligned).

study [9,10]. The impact of the pump current on spike-frequency adaptation was, however, preserved in models of other pump isoforms.

c) In our model, reductions in spike amplitude were directly related to intracellular sodium accumulation, see Fig. 1C. Activity-dependent reduction of action potential amplitude has previously been attributed primarily to  $\text{Na}^+$ -channel inactivation during prolonged stimulation [6,11]. Our simulations, however, demonstrate that the time course of amplitude reduction mirrors the drop in sodium reversal potential (see Fig. 1A), which is related to the time course of sodium accumulation (see Fig. 1B). The  $\text{Na}^+$ -channel inactivation was more than an order of magnitude faster than the timescale of spike-amplitude reduction; the slow spike amplitude decay was modulated by intracellular sodium. A dynamical system's perspective of this finding and an experimental confirmation are presented in the next sections.

### Analysis in the presence of noise

The results so far reflect idealized model responses in the absence of noise. To include the stochasticity of synaptic inputs that is typical for many neurons in the central nervous system, we next added coloured noise with stationary statistics to the input current - a useful exercise that reveals an interesting property in the response that was masked in the noise-free case discussed above.

Stimulating the model again with a step current yet in the presence of an additional colored noise component (Fig. 2), the model neuron's response during the first second was comparable to the noise-free case presented before:  $[\text{Na}^+]_i$  and  $[\text{K}^+]_o$  accumulated (resulting in changes in the reversal potentials  $E_{\text{Na}}$  and  $E_{\text{K}}$ ); spike frequency adaptation, and spike-amplitude reduction were observed (compare to Fig. 1A). Surprisingly, after the first second of stimulation, the response exhibited a sudden transition from regular spiking to an intermittently-interrupted, burst-like firing mode. Note that the stimulus statistics are in a wide-sense stationary such that there was no qualitative change in the stimulus during the simulation duration. This means that the qualitative switch in the firing pattern must arise from a bifurcation in the neuron's dynamics. The switch in firing pattern occurred 1.2 seconds after stimulus onset, a time scale that largely exceeds the time scale associated with the dynamics of spike-generating conductances (which are about two orders of magnitude faster). Yet this time scale matches the time scale of changes in ionic concentrations, suggesting that the switch is causally related to the ion accumulation. Ion accumulation influences spike generation by changing ionic reversal potentials and engaging the electrogenic Na-K-ATPase.

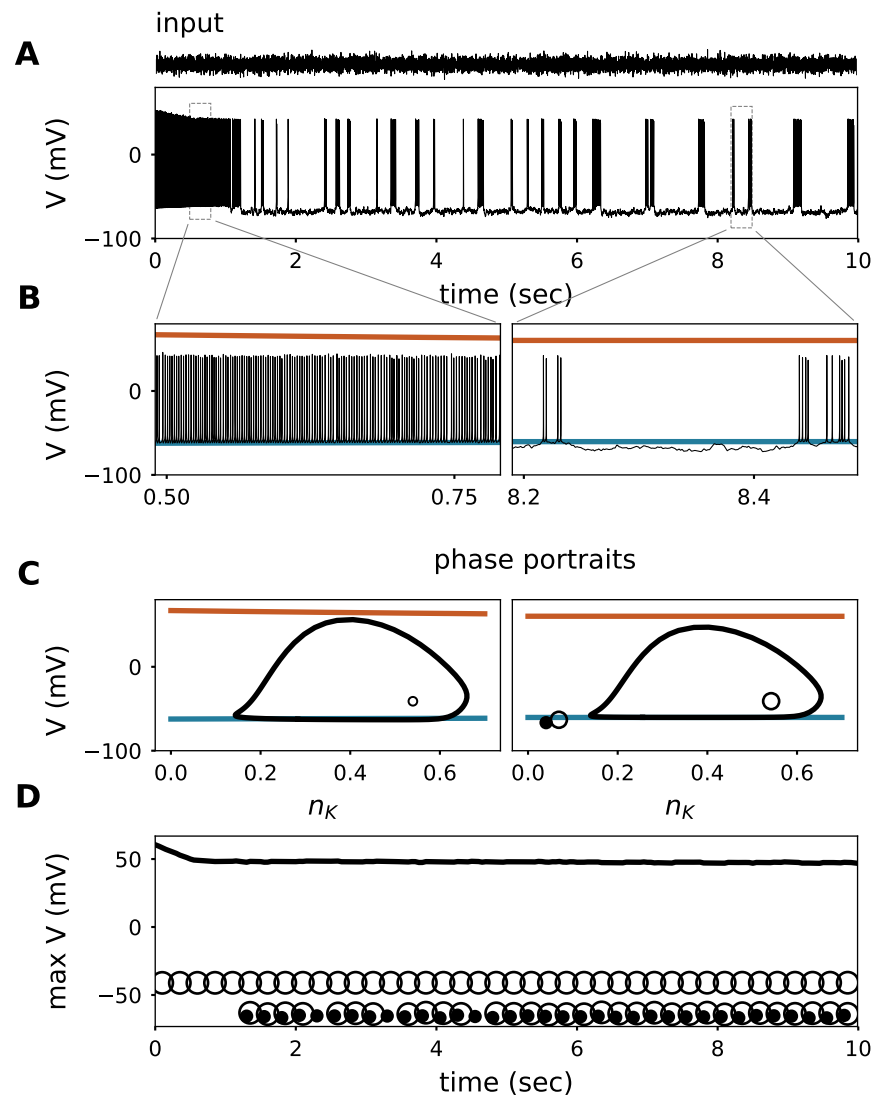

**Fig 2. Response of the model to a step current with colored noise filtered at 500Hz (mean input is  $1\mu A/cm^2$  and standard deviation  $1.05\mu A/cm^2$ , shown above). A.:** Voltage trace (membrane potential) of the model responding to a noisy step current (Top of panel). **B.:** Zoom of the voltage trace from panel A. at the beginning and towards the end of stimulation showing the evolution of the reversal potentials for sodium (orange) and potassium (blue), as in Fig. 1. **C.:** Phase portraits of the steady state of the fast spike generating sub-system, when imposing the average reversal potentials of panel B. as parameters. Vertical axes show the voltage and the horizontal axes show the potassium current gating-variable ( $n_K$ ). Empty dots are the unstable nodes, filled dots the stable nodes, and the orbits are stable limit cycles. **D.:** Evolution of the maximum voltage of the system attractors. Empty dots represent the unstable nodes, filled dots the stable nodes, and the black line denotes the maximum voltage of the stable limit cycles (action potential peak).

## Separating the fast and the slow dynamics

To disentangle the origin of the transition, in a next step, the fast spike-generating dynamics was separated from the slow ionic concentration dynamics using a slow-fast analysis. To this end, we systematically analyzed the fast system with fixed ionic concentrations (i.e., constant values of the slow concentration variables). The latter, however, were chosen from "snapshots" of the values that the concentrations had exhibited in the full system (where concentrations were varying). This approach allowed us to systematically determine how ionic changes shaped the ongoing properties of the fast sub-system. Time scale separation is valid because ionic concentration changes were much slower ( $\sim$  seconds) than the spike generating currents ( $\sim$  milliseconds) (see the methods section).

Analysis of the slow-fast system revealed that the qualitatively different spiking response was triggered by a switch in the dynamics of action-potential generation. Mathematically, the model started out in a setting where spiking is initiated via a saddle-node on invariant circle bifurcation (SNIC) [12]. This type of dynamics is characterized by the existence of a unique stable attractor for each input level, *i.e.* only one, well-defined state that the system converges to. For low inputs this is a fixpoint, *i.e.* the resting state, while for high inputs it is a limit cycle attractor, *i.e.* the regular spiking state. In models with fixed intra- and extracellular ionic concentrations, this type of dynamics would persist as long as cellular properties remain constant, *i.e.* across the whole stimulation period. Alterations in the level of ionic concentrations (and hence their transmembrane gradients in terms of reversal potentials), however, can qualitatively switch the dynamics to a different spike-generating bifurcation. A switch in the spike generating bifurcation, can be perceived in some qualitative characteristic features of spike trains. Such a transition can, for example, be reflected in an increased or decreased number of attractors. Indeed, when monitoring the number of stable attractors of the corresponding fast system at each point in time, their number changes exactly at the ionic concentrations reached at 1.2 seconds. Here, an additional stable fixed point (*i.e.* a stable voltage) appears in parallel to the spiking mode for the same size of input current; the system becomes bistable. Which of the two attractors (regular spiking or a fixed voltage) the system converges to, depends on the initial conditions and/or noise in the system. In Fig. 1, initial conditions are such that the neuron keeps up regular spiking because concentration changes are not substantial enough to reach the switch in spiking dynamics (the emergence of an additional fixpoint attractor). When ionic concentration changes are substantial enough they reach the switching point, in the presence of noise (like in Fig. 2), however, the system permanently receives perturbations and,



therefore, when entering the bistable dynamics (at  $\sim 1.2$  sec) only temporarily settles onto one of the two attractors before being kicked into the other one. This dynamical state results in a long-lasting, stochastic back-and-forth between periods of spiking and silence (Fig. 2). The transition from single attractor to bistability  $\sim 1.2$  seconds after stimulation onset is confirmed in the corresponding phase portraits of the fast system (Fig. 2C.).

Bistable *vs.* uni-stable states lead to qualitatively very different responses. The natural question that follows is: what generates the bistability? Mathematically, the bistability is caused by the emergence of a separatrix attached to a saddle point, i.e. a trajectory in phase space that separates the so-called basins of attraction of the two attractors. Depending on which side of the separatrix the system is located at a given point in time, it will converge towards the respective attractor (unless noise or an input fluctuation kick the system across the separatrix to the other side). Dynamics in this region are strongly affected by the reversal potential for potassium (see Fig. 2 C.). Therefore, we next systematically explored the effects of extracellular potassium on the fast system.

## Consequences of Extracellular potassium accumulation

### Dynamical systems analysis

We analyzed the dynamics of the fast system (i.e., the neuron model with fixed ionic concentrations) for different values of extracellular potassium. Fig. 3 shows the resulting two-parameter bifurcation diagram, which depicts the dynamical state as a function of extracellular potassium concentration and size of the applied input current (for details see the methods section). Four different dynamical regimes can be found: a silent subthreshold state, a regularly spiking state, a bistable state, and a silent state of depolarization block (when the model is depolarized so strongly that spiking cannot occur any more).

Let's look at the diagram in more detail, starting at lower extracellular potassium values (*i.e.*, the bottom of the diagram). Depending on the input strength, the system here either remains subthreshold or exhibits regular firing. The transition to spiking corresponds to a SNIC bifurcation (See Fig.S). When elevating the levels of extracellular potassium (to  $\sim 12$  mM), the situation changes. Here, an additional (bistable) region appears between the subthreshold and the regular spiking areas. The transition is marked by a codimension-two bifurcation called a saddle-node loop (SNL) [13]. The width of the bistable region increases for higher values of extracellular potassium concentration (dashed lines in Fig. 3). The firing threshold corresponds to the left border of the

bistable region. The transition to spiking now corresponds to a HOM bifurcation. In the bistable zone, in the presence of noise intermittently-interrupted firing can be observed. Moreover, at elevated extracellular potassium values, the depolarization block (as the name suggests, usually occurring at very large depolarization levels) can be observed at progressively lower input currents. At very high extracellular potassium values, it directly borders the bistable zone.

The full system (with variable concentrations and pump activity), as analyzed in Fig. 2, "lives" in the bottom part of the bifurcation diagram (Fig. 3) at the onset of the stimulation, as here the values of extracellular potassium are moderate. Over time, extracellular potassium accumulates and the switching point to HOM dynamics is passed. Here, the bistable range is entered and the burst-like, intermittently interrupted firing mode can be observed in Fig. 2 due to the presence of noise. The diagram shows that extracellular potassium is the bifurcating parameter that leads to the qualitative switches in spiking.

### **Experimental manipulation of extracellular potassium**

To experimentally test whether elevated levels of extracellular potassium can induce HOM dynamics of action potential generation, a verification of the model-predicted intermittently-interrupted burst-like firing mode suggests itself. In vitro, activity-driven accumulation of extracellular potassium is difficult to reproduce due to the continuously perfused bathing solution that constrains extracellular ion concentrations. We, therefore, recorded current-induced activity in mouse cortical pyramidal neurons exposed to different fixed concentrations of extracellular potassium. Action potentials were induced by constant-current stimulation in baseline conditions (3 mM extracellular potassium), and after increasing the concentration of extracellular potassium to 10 or 12 mM (see methods section). Neurons were stimulated with somatic current injection sufficient to maintain the membrane potential close to spiking threshold (see first panel of Fig. 4), which, in terms of dynamical system analysis, is close to limit cycle onset and, for HOM dynamics, also to the bistable region, see Fig. 3.

Our experimental results support the model prediction portrayed in Fig. 3, in which an increase in extracellular potassium concentration switches the spike generating mechanism. When extracellular potassium is low (3 mM), the neuron shows very rhythmic (regular) action potential generation over time (see Fig. 4 left panel). In contrast, when extracellular potassium is increased to 10 or 12 mM, action potential generation in the same neuron becomes irregular (see Fig. 4 right panel). In 7 out of 8 neurons tested, we observed an increase in spiking irregularity when potassium

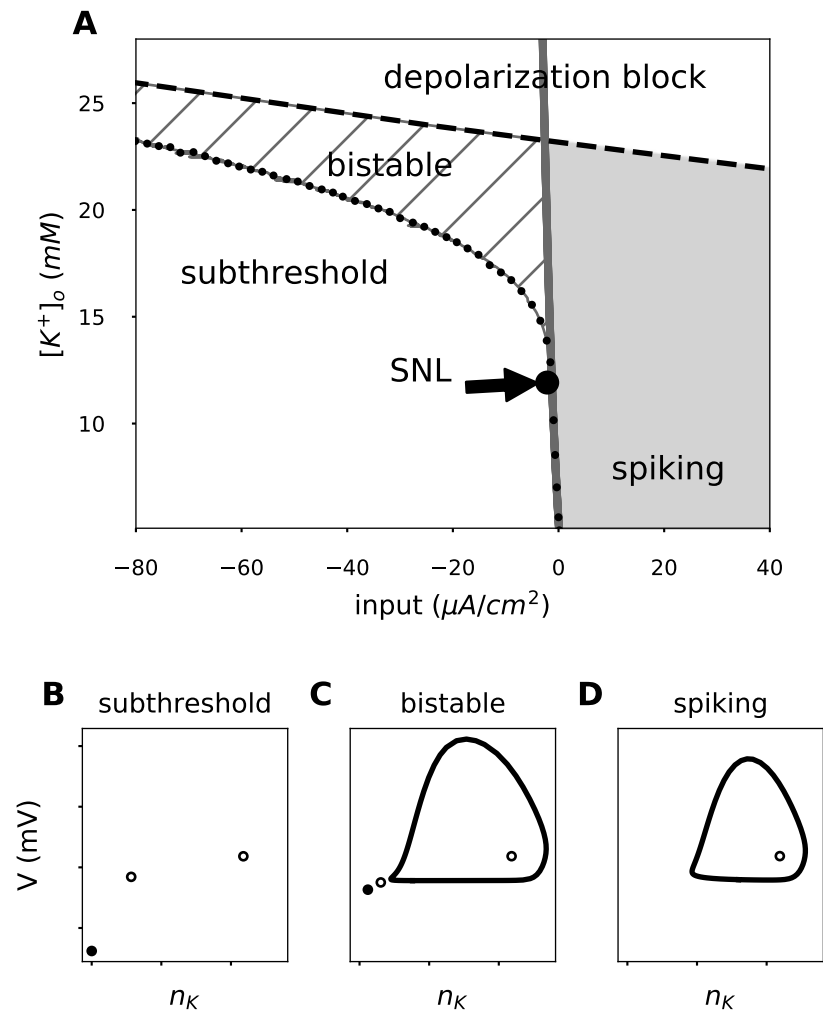

**Fig 3. Characteristic phase portraits in the extracellular potassium / applied current space.** Different combinations of extracellular potassium and input current yield different phase portraits of the fast spike generating sub-system. **A.** The background color represents the characteristic response of that area; Subthreshold or depolarization block : White; Bistable: Dashed; Spiking: Gray. The different regions are separated by the disappearance of the stable node (gray line) and the limit cycle onset (black dots). Examples of phase portraits in each region of the extracellular potassium - input current plane are portrayed; **B.** subthreshold, **C.** bistable, and **D.** spiking state.

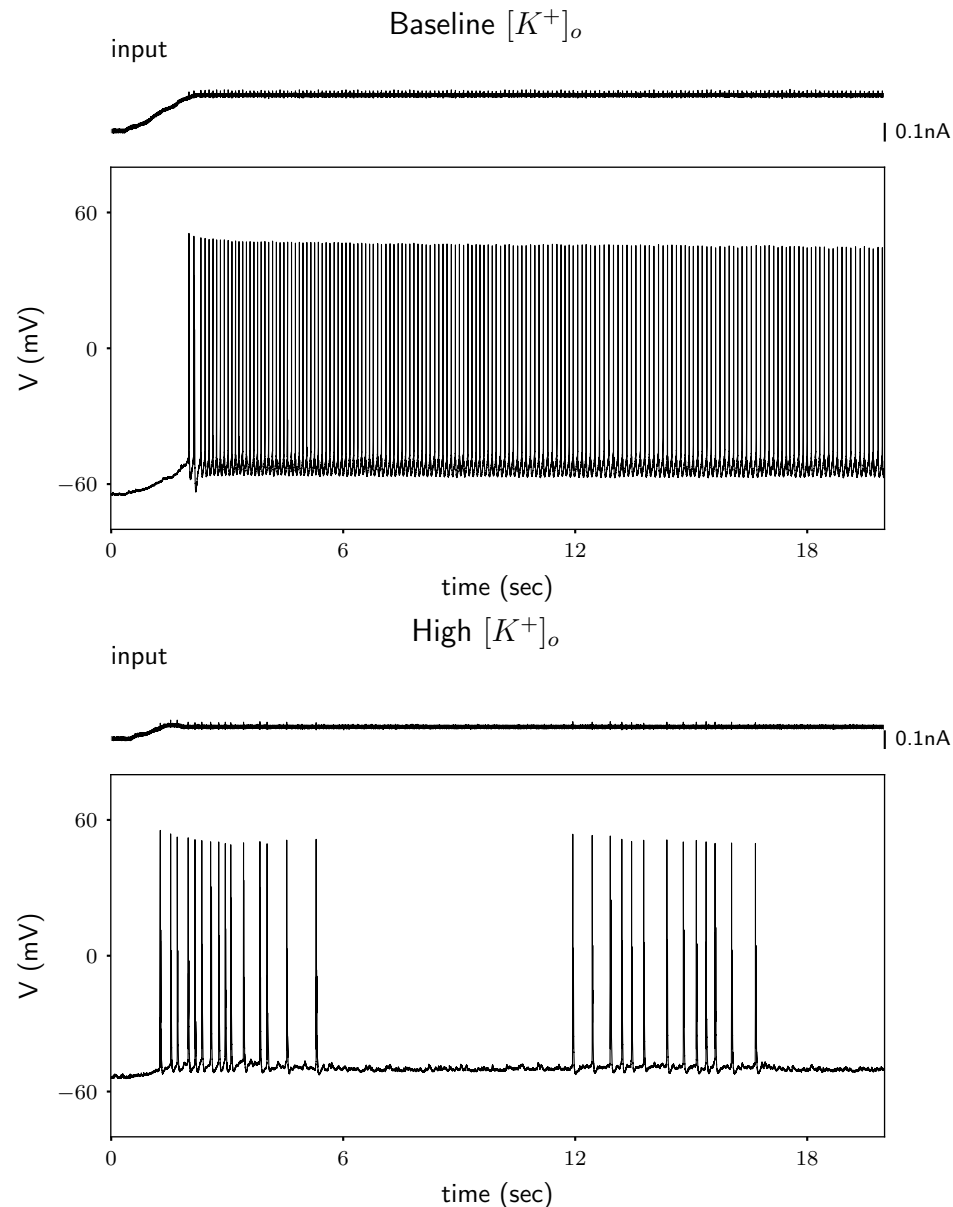

**Fig 4. Rodent cortical neurons exposed to high extracellular potassium show intermittently interrupted firing.** Example cell; Response of a neuron to a just suprathreshold stimulus in low (3 mM; Top) and high (10 mM; Bottom) extracellular potassium conditions. The suprathreshold current is taken as the current needed to elicit the first spike when injecting a ramp with a shallow slope. The small spikelets visible in the current trace are artifacts resulting from limited capacitive coupling of two channels at the digitizer (i.e., of the action potentials present in the voltage trace), and are not reflective of current injected into the neuron.

levels were increased from 3 mM to 12 mM (see supplementary material Fig. S. and S.). In 3 out of 197  
10 neurons tested, we observed an increase in spiking irregularity when potassium levels were 198  
increased from 3 mM to 10 mM (see supplementary material Fig. S), confirming a crucial prediction 199  
of the model. We hypothesize that not all neurons exhibited the same qualitative behavior because 200  
the distance to the switching point depends on other parameters as well [13] and hence is likely to be 201  
variable across cells [14]. It remains to be determined whether the activity of a single neuron 202  
generates the  $[K^+]_o$  accumulation that induces the SNL bifurcation. Presumably such transitions 203  
would be more likely when there are multiple neurons activated simultaneously, which would 204  
generate a larger  $[K^+]$  flux to the extracellular space. 205

## Consequences of intracellular sodium accumulation 206

The dynamical system analysis described above provides a mechanistic explanation for the emergence 207  
of intermittently-interrupted firing. However, the only concentration we varied for the analysis was 208  
that of potassium ions. Yet long periods of spiking accumulate both extracellular potassium and 209  
intracellular sodium ions. In the following section, we therefore describe physiological features that 210  
are altered by sodium accumulation. The space of sodium concentrations is explored to determine 211  
whether the results from the dynamical system analysis performed to understand the consequences 212  
of extracellular potassium accumulation, hold up under conditions of parallel sodium accumulation. 213

Sodium accumulation shapes two main properties of spike generation: spike amplitude and 214  
spiking threshold, which are determinant features for information transmission and encoding, 215  
respectively. 216

### Intracellular-sodium-dependent spike amplitude reduction 217

As outlined above, action potential amplitude is reduced as intracellular sodium accumulates during 218  
spiking (Fig. 1 and Fig. 2), reducing  $E_{Na}$  and hence the driving force. This effect is also reflected in 219  
the phase portraits (Fig. 2C.). The height of the stable limit cycle is squeezed during stimulation, 220  
correlating with the  $E_{Na}$  reduction (Fig. 1A.). We tested this model prediction in mouse cortical 221  
neurons *in vitro* during extended periods of current-induced spiking. 222

Extended activation of rodent cortical neurons led to a slow spike amplitude reduction (Fig. 5 223  
and Fig. S). Rodent cortical neurons were activated for 40 seconds using short (2 ms) depolarizing 224  
current pulses (3 nA) generated at 40 Hz. These neurons exhibited a slow and progressive reduction 225

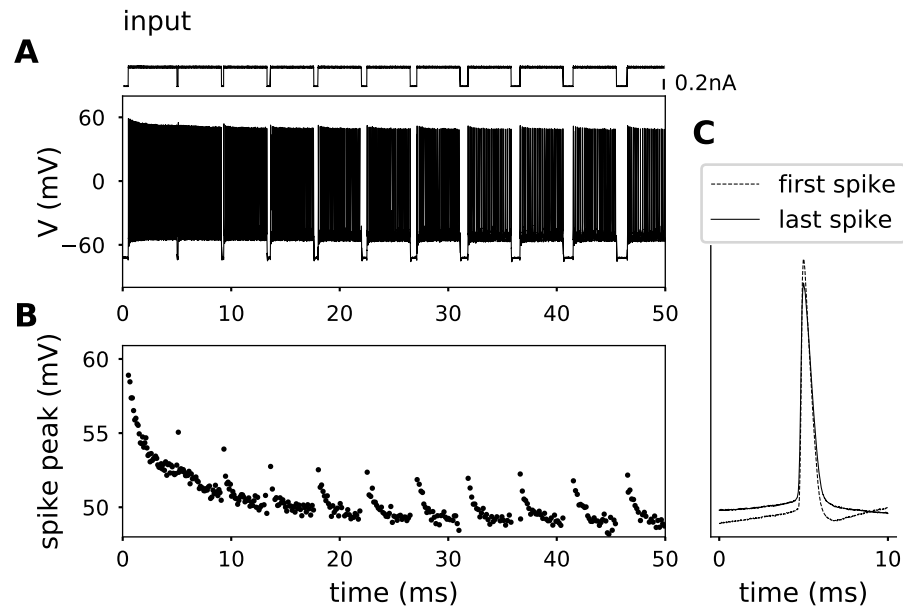

**Fig 5. Example trace: Evolution of spike peak in time.** **A** Membrane potential of a rodent cortical neuron, subjected to prolonged stimulation, and brief hyperpolarizing pulses with different duration. **B** Zoom into the membrane potential peak is shown. **C** First and last spike aligned at 5ms for comparison.

in spike amplitude that was best fit by a double exponential decay with an average fast time constant ( $\tau_{fast}$ ) of 480 ms and an average slow time constant ( $\tau_{slow}$ ) of 17.7 s ( $n=50$ ) (see Supplementary material Fig. S. and Table S. for details). The observed slow spike amplitude decay fits the prediction of the model, given that sodium accumulation occurs on the order of seconds, and the faster time scale coincides with the previously reported effects of sodium inactivation [15].

More than one process contributes to spike amplitude decay: a fast process (sodium channel inactivation) and a slow process (sodium accumulation). In order to disentangle the contribution of the two, we used somatic current injection to drive rodent cortical neurons with periodic brief (100 to 1000 ms) hyperpolarizing currents (Fig. 5) that were long enough to reset (deinactivate) sodium channels, but too short for the Na-K-ATPase to clear activity-dependent increases in intracellular sodium. We observed a progressive reduction in action potential amplitudes that was not rescued by hyperpolarizations as long as one second. Further, the slow time constant of spike amplitude decay was found to coincide with that measured in the previous protocol,  $\tau_{slow} = 15.7s$  (Fig. and Tab. S.). These observations suggest that the slow component of amplitude decay cannot result from sodium channel inactivation, and instead is likely driven by intracellular sodium accumulation and the

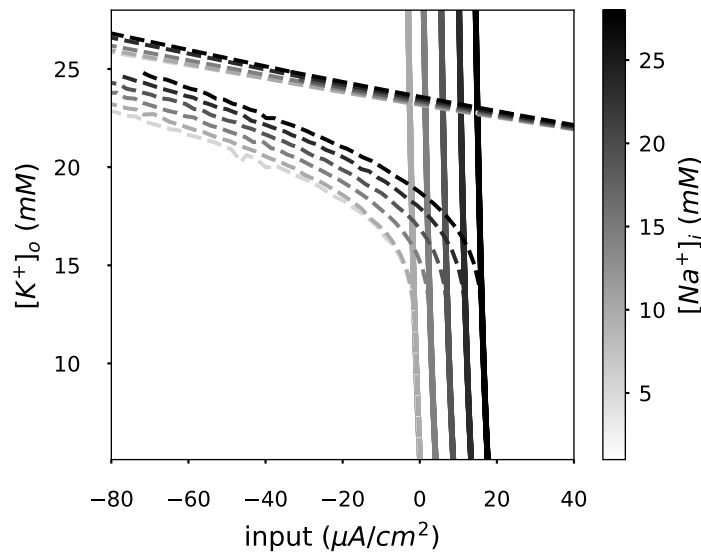

**Fig 6. Extracellular potassium and intracellular sodium dependent bistable area.** Same bifurcation diagram portrayed in Fig. 3 for different intracellular sodium concentrations  $[Na^+]_i$ .  $[Na^+]_i$  controls the input current required to transition from resting to spiking regimes.  $[Na^+]_i$  accumulation shifts the bistable region to higher current values.

resulting decrease in  $E_{Na}$ .

241

### Intracellular sodium accumulation shifts the spiking threshold in the model

242

Given that an accumulation of intracellular sodium ( $[Na^+]_i$ ) is likely to affect spike generation, we next systematically evaluated the dynamical regimes identified in the bifurcation diagram at different, fixed  $[Na^+]_i$  concentrations (Fig. 6).

243

244

245

We find an identical bifurcation structure and splitting into different dynamical regimes for a wide range of  $[Na^+]_i$  levels, with the exception of a shift towards higher input currents with larger  $[Na^+]_i$  (Fig. 6). In other words, as  $[Na^+]_i$  accumulates, the spiking threshold is shifted to higher inputs. This shift can be attributed to the dependence of the Na-K pump on  $[Na^+]_i$ ; accumulation of  $[Na^+]_i$  thus strengthens the hyperpolarizing pump current, counteracting the input current and reducing the net excitatory drive. Consequently, also the bistable region is shifted along the current axis. Neither a significant change in the area of the bistable region, nor in the location of the transition point towards bistability (i.e., the SNL bifurcation) on the  $[K^+]_o$  axis are observed.

246

247

248

249

250

251

252

253

## Consequences of simultaneous $[Na^+]_i$ and $[K^+]_o$ changes

The effect of ionic concentrations on neuronal voltage dynamics unfolds via changes in the respective reversal potentials,  $E_{Na}$  and  $E_K$ . Fixing the input current, we can summarize how the spiking regime depends on the concentrations ( $[Na^+]_i$  and  $[K^+]_o$ ) in a plot that depicts the spiking regime (reached in the steady-state of the fast subsystem) as a function of the two corresponding reversal potentials (Fig. 7). The regime was determined via the phase plane of each system (Fig. 3B.,C.,D.) and can be classified as bistable, regularly spiking, or stable-resting (i.e., either subthreshold or in depolarization block). To relate the reduced fast subsystem with the complete system including slow concentration dynamics, three example trajectories of the complete system at different initial conditions in the space of reversal potentials are shown on top of the steady states of the fast subsystem. Each trajectory represents the evolution of ionic concentrations during 10 seconds of stimulation with a fixed current in the presence of noise (as in Fig. 2). The corresponding voltage traces are presented for comparison (Fig. 7B.,C.,D.). Traces that started at a higher firing rate (and, consequently, were accompanied by larger changes of ionic concentrations) moved farther than the ones that started out at a lower rate.

Which spiking regime a model neuron enters during stimulation, can be read off the corresponding trajectory in the complete system. The trajectory depends on the initial ionic concentrations at stimulation onset. A neuron starting with a very low  $E_K$  yet high  $E_{Na}$  tends to move from regular spiking either to a resting state or to a lower firing rate within the regularly spiking regime (yellow trajectory in Fig. 7, similar to the example trace in Fig. 7D.). Biophysically, spike-frequency adaptation results from the activity of the electrogenic pump, which generates a progressively larger hyperpolarizing current as levels of intracellular sodium increase. Trajectories initialized at low  $E_K$  do not reach the bistable region. They tend to a quiescent mode, remaining close to the border to regular firing. If the initial  $E_K$  is more elevated, however, a neuron that starts in the regularly spiking regime can reach the bistable region (orange trajectory in Fig. 7, similar to the example trace in Fig. 2). Very high initial extracellular potassium concentrations promote depolarization block, but, depending on initial conditions, the bistable regime may also be encountered as an intermediate state (magenta trajectory in Fig. 7).

The three example trajectories displayed in Fig. 7, illustrate that a neurons with identical ion channels and stimulation can generate extremely different responses depending on the extracellular environment. Recent spiking activity of neurons alters their response, even when stimulation is



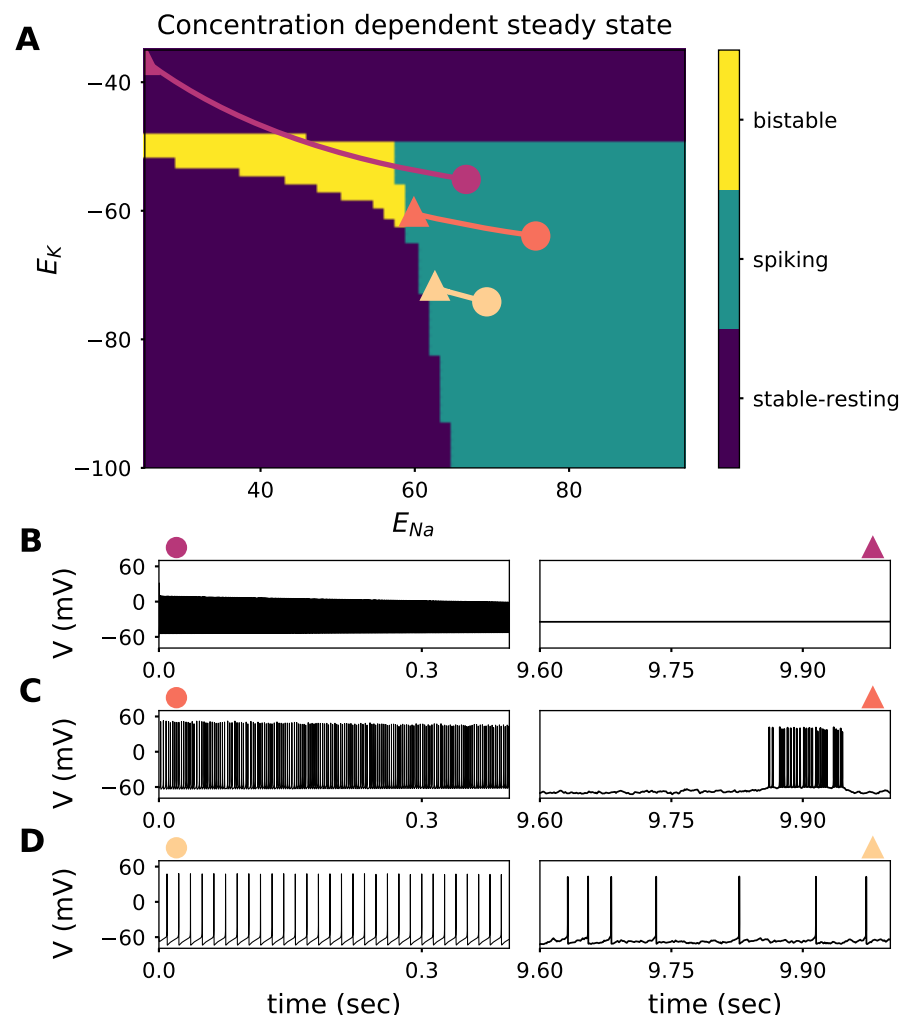

**Fig 7. Consequences of simultaneous  $[Na^+]_i$  and  $[K^+]_o$  changes** **A.:** Characteristic response of the reduced model (receiving a constant input current stimulus of  $1\mu A/cm^2$ ) along the reversal potential plane. The characteristic response can be split in three categories; stable-resting state (lower left corner, subthreshold regime; upper part of the figure: depolarization block. Both represented in purple), spiking state (green), and bistable (yellow). Three example trajectories of the complete system (Including the slow concentration dynamics) simulated during 10 seconds (with an irregular input of mean of  $1\mu A/cm^2$  and standard deviation of  $1\mu A/cm^2$ ). The initial conditions represented by a circle, and the state of the system 10000 ms later with a triangle. **B.:** Membrane potential trace of the trajectory with initial conditions  $E_K = -55.1mV$  and  $E_{Na} = 66.7mV$  displayed in **A**. Left panel shows the first 400ms of simulation (marked with a circle), and the right panel shows the last 400ms out of the 10 seconds simulation (marked with a triangle). **C.:** Membrane potential trace of the trajectory with initial conditions  $E_K = -63.9mV$  and  $E_{Na} = 75.7mV$  displayed in **A**. **D.:** Membrane potential trace of the trajectory with initial conditions  $E_K = -74.2mV$  and  $E_{Na} = 69.3mV$  displayed in **A**.

unchanged; the rate of change of ionic concentrations strongly depends on neuronal firing rate. 285  
Consequently, neurons receiving strong and prolonged stimulation are more likely to experience 286  
dynamical regime changes due to ionic accumulation than neurons with weaker stimulation. 287

## Discussion 288

In this study, we show that activity-dependent changes in ionic gradients during prolonged neuronal 289  
activation can indeed qualitatively change the underlying neuronal dynamics. This fact is reflected 290  
most pronouncedly in a change in spiking pattern from regular to an intermittently interrupted 291  
mode, which appears when extracellular potassium accumulates. Intracellular sodium accumulation, 292  
in contrast, mediates a long-lasting spike-frequency adaptation via engagement of the sodium 293  
potassium pump, and lowers spike amplitude by its effect on the reversal potential  $E_{Na}$ . 294

We claim that for highly active neurons, an assumption of stationarity of neuronal dynamics is 295  
not precise; neurons are intrinsically affected by their recent electrical activity, beyond any other 296  
changes that may arise from network feedback. Extended spiking activity results in modifications of 297  
the intracellular and extracellular concentrations of sodium and potassium, respectively, and triggers 298  
homeostatic mechanisms that regulate ionic gradients at time scales much slower than action 299  
potential genesis and bears consequences for neural computation. 300

**Switching to the HOM firing regime:** We demonstrate that neuron models that start out 301  
with SNIC dynamics (i.e., the classical type I dynamics that has been thought to underlie the firing 302  
of most cells with a smooth onset of firing at threshold) can flip to HOM dynamics only seconds 303  
after the onset of the spike-inducing stimulation. This transition most obviously manifests in the 304  
spiking pattern, which turns from a regular firing mode to an intermittently interrupted one. Our 305  
bifurcation analysis shows that an accumulation of extracellular potassium drives this change, 306  
instantiating a bistability of the membrane potential. 307

This finding is consistent with previous work in neuronal models with static ionic concentrations 308  
at different levels of extracellular potassium [16,17]. In the presence of a fluctuating input (be it 309  
noise or signal), the bistability renders neurons susceptible to switches between the two stable states, 310  
giving rise to an irregular, intermittently interrupted firing pattern of short firing phases and pauses 311  
of different durations. Long periods of silence, which can be prominent in this mode, can resemble 312  
the ones observed during deterministic bursting reported by [18–22]. In contrast to these 313  
deterministic bursters, however, the burst-like firing we describe here is driven by the input 314

fluctuations and the bistable state. Thus, neurons in an environment with high extracellular potassium concentration, promoting HOM dynamics, may be more sensitive to input variability.

The SNIC and the HOM regimes yield very different neuronal encoding properties. For instance, the relationship between the input current and the neuronal firing rate (i.e., the gain) depends on the dynamical regime. The gain function of a neuron in the SNIC regime is continuous, the firing rate of such neuron is a continuous function of the input current. The gain function of a neuron in the HOM regime is discontinuous when irregular input is injected, meaning that the firing rate doesn't smoothly increase as a function of the input current but it transitions from no spikes to high frequency spiking abruptly. The phase response curve (PRC), which captures the temporal sensitivity to inputs, also differs between the two regimes. In the SNIC regime, neurons display symmetric PRCs. As PRC symmetry predicts the synchronization of the neurons in the network [13,23,24], the switch in firing regime and the underlying bifurcation must also impact the propensity of the neuron to synchronize with other cells in its local network and beyond. Encoding capabilities (such as the profile of frequencies transmitted) are likely to be affected, as they also depend on the PRC characteristics.

Interestingly, intracellular sodium accumulation only quantitatively modulates the qualitative change in spiking regime, underlining the importance of potassium accumulation in this process. The effect of extracellular potassium on neuronal activity has been widely studied [25–27]. Experimental observations have found extracellular potassium dependent bursting [27] and its influence on other dynamical features [16,17,28]. While a bistability has been previously observed "in passing" [16,17], we report a systematic effect and provide mechanistic explanations for the activity-driven changes.

Interpreting these results, we speculate that activity-dependent extracellular potassium accumulation can contribute to, or even induce, epileptiform activity [20]. Both the bursting nature of HOM dynamics [29,30], as well as their comparatively high susceptibility to synchronization in inhibitory networks because of the HOM-characteristic PRC [13], favour synchronized, hyperexcitable states. *In vivo*, Singer and Lux observed that extracellular potassium accumulates in the visual cortex when a rapidly changing visual stimulus is presented to the cat's retina [4]. Remarkably, similar visual stimuli elicit reflex seizures in 4–7% of human epilepsy patients [31]. Reflex seizures could be promoted by extracellular potassium accumulation occurring throughout the visual cortical region that is activated by visual stimulation.

Indeed, the observed drastic consequences of potassium accumulation might occur more frequently *in vivo* than *in vitro*. *In vitro*, extracellular potassium concentrations are clamped. The

tissue is perfused with a solution that has a fixed  $[K^+]_o$  (consequently  $[K^+]_i$ ) concentration, 347  
analogue to an infinite buffer. *In vivo*, however, extracellular potassium concentration undergoes 348  
stimulus-induced changes. In the cat visual cortex, for instance, extracellular potassium accumulates 349  
when a graded stimulus is presented to the cat's retina [4]. Regarding the universality of the 350  
dynamical changes described here, we expect these to generalize beyond the specific model choice of 351  
this study. Specifically, the bistability of conductance based models arises from a slow-down of 352  
hyperpolarization, which pushes the limit cycle trajectory to approach the saddle node through a 353  
very attractive path (i.e., a strong manifold). This feature can be expected in any neuron model that 354  
starts out with SNIC dynamics and ubiquitously favours a switch to HOM dynamics [13,32]. The 355  
exact reversal potential at which the bistability is induced, could be shifted by other parameters. 356  
Thus, the exact switching point between the two dynamical regimes can vary between neurons, as 357  
their properties are diverse [14,33]. Therefore, we expect that the exact location of the switching 358  
point (i.e., the potassium concentration at which the switch is to be expected) depends on cellular 359  
characteristics, both in neuron models as well as in experiments. Along these lines, milder 360  
extracellular potassium accumulations could suffice to induce the transition in cells with a lower 361  
critical value, singling out cells with a higher likelihood to switch their dynamics. 362

**Attenuation of the spike amplitude:** Next to the very prominent change in spiking regime, 363  
accumulation of ions are also reflected in the shape of action-potentials, namely their peak 364  
amplitude. Such an attenuation is a regular feature observed in electrophysiological recordings. It 365  
has, however, been previously attributed to an inactivation of sodium channels [6,15]. Our data now 366  
suggest that the activity-induced changes in reversal potentials contribute substantially to the 367  
attenuation, especially during long periods of activity, as they far outlast the effects inactivation. 368  
Our deinactivation experiments with hyperpolarizing current steps support this hypothesis and 369  
confirm that the larger and slower component of spike amplitude reduction persist even when 370  
sodium channel inactivation is largely diminished. Moreover, the timescales of  $E_{Na}$  and amplitudes 371  
attenuation are matched. 372

**Concentration-change induced spike-frequency adaptation:** Spike-frequency adaptation 373  
resulted from an activity-dependent increase in the hyperpolarizing sodium pump current (again 374  
mediated by sodium accumulation). This observation was previously reported for leech 375  
mechanoreceptor neurons [34] as well as for rodent cortical neurons [5]. The later study [5] 376  
demonstrated not only that the pump current produces a slow afterhyperpolarization (AHP) as a 377  
consequence of neural activity, but that its time-course mirrors the time-course of intracellular 378

sodium decay. Results from our model are consistent with this finding. 379

Interestingly, for both spike amplitude attenuation and spike frequency adaptation, 380  
ion-channel-mediated equivalent effects on short timescales are well known. The dynamics of 381  
concentrations seem to smoothly extend these effects in time. 382

**Limitations:** We note that our model does not consider extracellular uptake of potassium by 383  
glial cells. The latter maintain the ionic homeostasis of the extracellular environment and serve as 384  
extracellular potassium buffers [35]. Experimental work Dallerac et al. [36] has shown that glial 385  
buffering of extracellular potassium saturates at high values when changes are relatively fast. Yet 386  
the presence of glial cells *in vivo* is likely to slow the timescale of potassium accumulation. The 387  
effects described here can be expected to arise most prominently in pathological conditions, be it 388  
glial dysfunction or energy-deprivation that impairs the pumps and thus facilitates accumulation of 389  
both extracellular potassium and intracellular sodium. 390

We also note that the experiments in this study were performed in the absence of synaptic 391  
blockers. This keeps the pharmacological cocktail "neater", but it also raises the possibility that 392  
changes in synaptic input may contribute to the irregularity displayed in the single-cell 393  
measurements. Specifically, two opposing effects may come into play: (i) Extracellular potassium 394  
accumulation shifts  $E_K$  to more depolarized potentials; this in turn may foster the passive inflow of 395  
chloride, moving also  $E_{Cl}$  to a more depolarized state. These effects reduce GABA-A and GABA-B 396  
efficacy and reduce synaptic inhibition, by depolarizing the IPSP equilibrium potential [37]. (ii) Also 397  
extracellular potassium dependent inhibition of glutamate transporters may contribute [38], 398  
decreasing excitatory synaptic transmission. Having said so, an increase in extracellular potassium 399  
also increases the firing rate of neurons in the whole network and it is not probable that the synaptic 400  
efficacy reduction could counterbalance the increase in the network input. Network interactions may 401  
have many nonlinear effects, and it is not trivial to draw conclusions on causality. 402

## Conclusion 403

Our analysis shows that a consideration of the slow ionic concentration dynamics inherent to *in vivo* 404  
brain activity unravels the nonstationary nature of neurons as computational units. Cortical neurons 405  
are typically grouped as either intrinsically bursting, regular spiking, or fast spiking [39]. Here, we 406  
reveal a more dynamic situation: by accumulation of ions during prolonged activity, regularly 407  
spiking neurons may transition to an intermittently firing mode, or even resemble intrinsically 408

bursting neurons, via activity-induced switches in the underlying bifurcation structure of its dynamics. Neuronal firing patterns are dynamical even in the absence of network changes and strongly depend on the concentrations in the extracellular and intracellular medium. In particular, HOM-type dynamics are likely to be induced in situations of impaired ionic homeostasis, such as glial pathologies or reduced energetic supplies, affecting neural encoding and potentially the network state.

## Materials and methods

With the purpose of understanding the effect of different ionic concentrations on the neuron's response, we used two approaches: simulations of a single-neuron mathematical model with dynamic concentrations, and patch-clamp of rodent cortical neurons while perfusing the medium to control the extracellular ionic concentrations.

### Computational model

Our goal is to understand the effects of ionic concentration dynamics on the excitability of neurons. Two ingredients are needed: an excitable system (capable of generating spikes) for which we use the Traub-Miles formulation [40] (See equations (1),(2),(3),(4)), and a description for the ionic concentration changes that occur due to ionic currents. The action potential dynamics at a membrane is governed by a current balance equation involving the following ionic currents,

$$C_m \frac{dV}{dt} = I_{app} - I_{Na} - I_K - I_L - I_{pump}. \quad (1)$$

$$I_{Na} = g_{Na} m_{Na}^3 h_{Na} (V - E_{Na}) \quad (2)$$

$$I_K = g_K n_K^4 (V - E_K) \quad (3)$$

$$I_L = g_L (V - E_L) \quad (4)$$

$$I_{pump} = \begin{cases} 0 & [Na^+]_i \leq [Na]_s \\ \frac{I_{maxp}}{1 + \exp(k_{Na}([Na^+]_i - [Na]_s))} & [Na^+]_i > [Na]_s \end{cases} \quad (5)$$

The pump model in Eq. (5) constitutes a homeostatic mechanism that counteracts the movement

of ions due to chemical gradients during neuronal spiking activity. Specifically, the sodium 429  
 potassium pump (Na-K-ATPase) pumps 3 sodium ions out of the cell, while 2 potassium ions enter 430  
 the cell every pump cycle. The pump is represented by sigmoidal function of the intracellular  $\text{Na}^+$  431  
 concentration in Eq. (5) [19, 41].  $I_{\text{maxp}}$  is the maximum pump rate,  $k_{\text{Na}}$  is the sodium sensitivity of 432  
 the pump, and  $[\text{Na}]_s$  is the sodium concentration at which the pump current is most sensitive to 433  
 concentration changes. We ignore the pump's dependence on potassium and on voltage. This is an 434  
 analog of Na-K-ATPase (isoform 3), which reacts very strongly to intracellular sodium changes, and 435  
 is rather insensitive to potassium in the range we study ( $[\text{K}^+]_o$  4-20 mM) [9]. 436

The concentration dynamics is influenced by the transmembrane currents due to ion channels 437  
 and the pump as follows. 438

$$\frac{d[\text{Na}^+]_i}{dt} = \frac{\rho}{F}(-3I_{\text{pump}} - I_{\text{Na}}) \quad (6)$$

$$\frac{d[\text{K}^+]_i}{dt} = \frac{\rho}{F}(2I_{\text{pump}} - I_{\text{K}} - I_{\text{L}}) \quad (7)$$

$$\frac{d[\text{K}^+]_o}{dt} = -\frac{d[\text{K}^+]_i}{dt} \frac{\text{Vol}_i}{\text{Vol}_e} \quad (8)$$

$$E_{\text{K}} = \frac{RT}{F} \ln\left(\frac{[\text{K}^+]_o}{[\text{K}^+]_i}\right) \quad (9)$$

All expressions and parameters used in the simulations can be found in Tables S. , S., and S.. 439  
 Simulations were performed in python and code is available here. 440

### Time scale separation 441

Simulating the model dynamics with an ODE solver is very time consuming (This was done for 442  
 voltage traces in Fig. 1, 2, and 7). Therefore, in order to characterize the system's response to a 443  
 broad set of initial conditions using shorter simulation times, we used time scale separation for the 444  
 analysis. This technique is particularly useful for our set of equations because the system contains 445  
 variables changing in very slow and very fast time scales. 446

Ionic concentration dynamics change with a time scale in the order of seconds, while spike 447  
 generating currents are changing in the order of milliseconds. Thus, we can split the system into two 448  
 subsystems. The fast subsystem (Equations 2,3,4,5 ,9,1) receives ionic concentrations 449

( $[\text{Na}^+]_i$ ,  $[\text{K}^+]_i$ ,  $[\text{K}^+]_o$ ), as fixed parameters. For each parameter combination the steady states are portrayed in phase portraits (See Fig. 2 bottom panel). A parameter combination that yields a phase portrait containing only one stable node is characterized as resting state, one containing only a stable limit cycle is characterized as regular firing, and one with a stable node and a stable limit cycle is characterized as bistable (See Fig. 7 A.).

### Bifurcation analysis

The numerical bifurcation software AUTO [42] was used to find the limit cycle onset (spike onset), the disappearance of the steady state, and the hopf bifurcation (depolarization block). The analysis was repeated for different ionic concentrations (See in Fig. 3 and 6).

### Experimental protocol

Physiological experiments were approved by the Institutional Animal Care and Use Committee of Dartmouth College. Female and male adult (3- to 4-month-old) C57BL/6J mice were bred in facilities accredited by the Association for Assessment and Accreditation of Laboratory Animal Care and maintained on a 12h-12h light-dark cycle with continuous free access to food and water.

On the day of experiments, mice were anesthetized with vaporized isoflurane and decapitated, with brains rapidly removed into an artificial cerebral spinal fluid (aCSF) composed of (in mM): 125 NaCl, 25  $\text{NaHCO}_3$ , 3 KCl, 1.25  $\text{NaH}_2\text{PO}_4$ , 0.5  $\text{CaCl}_2$ , 6  $\text{MgCl}_2$  and 25 glucose (saturated with 95%  $\text{O}_2$ -5%  $\text{CO}_2$ ). Coronal brain slices (250  $\mu\text{m}$  thick) of the frontal cortex were cut using a Leica VT 1200 slicer and stored in a holding chamber filled with aCSF containing 2 mM  $\text{CaCl}_2$  and 1 mM  $\text{MgCl}_2$ . Slices were maintained in the holding chamber for 45 minutes at 35° C, and then at room temperature ( $\sim 25^\circ\text{C}$ ) until use in experiments.

Slices were transferred to a recording chamber on a fixed-stage microscope (Olympus), and continuously perfused ( $\sim 7$  ml/min) with oxygenated aCSF heated to 35-36 °C. Layer 5 pyramidal neurons in the prelimbic cortex were visually targeted using a 60X water-immersion objective, and whole-cell recordings made with patch pipettes (5-7 M) filled with a solution containing the following (in mM): 135 potassium gluconate, 2 NaCl, 2  $\text{MgCl}_2$ , 10 HEPES, 3  $\text{Na}_2\text{ATP}$  and 0.3  $\text{Na}_2\text{GTP}$ , pH 7.2 with KOH. Data were acquired using a BVC-700 amplifier (Dagan Corporation) connected to a HEKA 8+8 digitizer driven by AxoGraph software (AxoGraph Scientific; RRID: SCR - 014284). Membrane potentials were sampled at 50 to 100 kHz and filtered at 5 or 10 kHz. Voltage



measurements were corrected for a +12 mV liquid junction potential. Concentrations of KCl (3, 10, 479  
or 12 mM) and NaCl (125, 118, or 116 mM, respectively) were adjusted as indicated to test the 480  
impact of extracellular potassium concentration on action potential dynamics. 481

## Data analysis 482

Data analysis was done in python. 483

**Spiking irregularity** Spiking irregularity is measured as 484

$$CV = \frac{\sigma}{\mu}, \quad (10)$$

where  $\sigma$  is the standard deviation of the interspike interval (ISI), and  $\mu$  is the mean. 485

### Time scale of spike amplitude decay 486

The fast and the slow components of the spike amplitude decay were calculated by fitting the 487  
time dependent spike-voltage-peak to a double exponential function, 488

$$D_{fast} \exp\left[\frac{-t}{\tau_{fast}}\right] + D_{slow} \exp\left[\frac{-t}{\tau_{slow}}\right] + D_{ss}. \quad (11)$$

The distribution of the parameters that yield the best fit across all traces measured are shown in 489  
Fig., Table. and Table.. 490

## Supporting information 491

**S1 Fig. Transition from rest to spiking (limit cycle onset bifurcations) for different 492  
extracellular potassium concentrations.** From bottom to top; SNIC (saddle-node on invariant 493  
circle): Purple, SNL (Saddle-node-loop): Blue; HOM (saddle homoclinic orbit): Green. In the SNIC 494  
regime the stable node collides with an unstable node, giving rise to a saddle node. The limit cycle 495  
orbit passes through the saddle node, the trajectory leaves the saddle node along the semi-stable 496  
manifold. After one period trajectory approaches the saddle node along the same semi-stable 497  
manifold. At the SNL point, trajectories leave the saddle node along the semi-stable manifold as in 498  
the SNIC case, but after one period those trajectories approach the saddle node along the strongly 499  
stable manifold. Notice that the SNL orbit is smaller than the SNIC orbit, and has a shorter period. 500  
In the HOM regime a stable node and a limit cycle coexist. External perturbations shift the state of 501

the system from the stable node to the attraction domain of the limit cycle attractor. 502

**S2 Fig. Spike amplitude slow decay. Depolarizing pulses applied at a 40Hz rate.** 503

**Spike amplitude decay**  $\tau_{slow} = 13.6(seg)$ , and  $\tau_{fast} = 410(ms)$ . Notice that the amplitude of 504  
the last spike doesn't recover its amplitude after the hyper-polarizing pulse. 505

**S3 Fig. Distribution of time scales of the double exponential decay (equation 11) of 506  
the spike amplitude.** Two protocols were used to measure the time scales of spike amplitude 507

decay, an example of the "40 Hz Depolarizations" is shown in Fig. , and an example of the 508  
"Hyperpolarization" is shown in Fig. 5. Notice that the distribution of  $\tau_{slow}$  is independent of the 509  
protocol used. 510

**S4 Fig. Spiking variability calculated as the coefficient of variation ( $CV = \frac{\sigma}{\mu}$ ) for all 511**

**cells sampled, when stimulating with white noise added to the baseline input.** An 512  
increase from 3mM to 12mM in extracellular potassium increased the spiking variability of 5 out of 6 513  
cells measured. 514

**S5 Fig. Spiking variability calculated as the coefficient of variation ( $CV = \frac{\sigma}{\mu}$ ) for all 515**

**cells sampled, when stimulating with baseline input.** An increase from 3mM to 12mM in 516  
extracellular potassium increased the spiking variability of 2 out of 2 cells measured. The main 517  
source of stimuli irregularity was the network activity. 518

**S6 Fig. Spiking variability calculated as the coefficient of variation ( $CV = \frac{\sigma}{\mu}$ ) for all 519**

**cells sampled.** An increase from 3mM to 10mM in extracellular potassium increased the spiking 520  
variability of 3 out of 10 cells measured. The main source of stimuli irregularity was the network 521  
activity. 522

**S1 Table. Summary of the distribution of the best fit of the parameters for each of 523  
the 50 traces. Depolarizing pulses applied at a 40Hz rate** 524

**S2 Table. Summary of the distribution of the best fit of the parameters for each of 525  
the 73 traces. Hyperpolarizing pulses.** 526

**S3 Table. Gating dynamics used for the Traub-Miles model.** 527

**S4 Table. Expressions used for the Traub-Miles model.**

528

**S5 Table. Parameters used for the Traub-Miles model.**

529

## Acknowledgments

530

This work was supported by grants from the German Federal Ministry of Education and Research (BMBF, 01GQ1403), the DFG (RTG 1589), and the National Institutes of Health–National Institute for Mental Health (R01 MH099054).

531

532

533

## References

### References

1. Hodgkin AL, Huxley AF. A quantitative description of membrane current and its application to conduction and excitation in nerve. *The Journal of Physiology*. 1952;117(4):500–544. doi:10.1113/jphysiol.1952.sp004764.
2. Ding F, O'Donnell J, Xu Q, Kang N, Goldman N, Nedergaard M. Changes in the composition of brain interstitial ions control the sleep - wake cycle. *Science (New York, NY)*. 2016;352(6285):550–555. doi:10.1126/science.aad4821.
3. Amzica F, Steriade M. Neuronal and glial membrane potentials during sleep and paroxysmal oscillations in the neocortex. *The Journal of neuroscience : the official journal of the Society for Neuroscience*. 2000;20(17):6648–65.
4. Singer W, Lux H. Extracellular potassium gradients and visual receptive fields in the cat striate cortex. *Brain Research*. 1975;96(2):378–383. doi:10.1016/0006-8993(75)90751-9.
5. Gullledge AT, Dasari S, Onoue K, Stephens EK, Hasse JM, Avesar D. A sodium-pump-mediated afterhyperpolarization in pyramidal neurons. *The Journal of Neuroscience*. 2013;33(32):13025–13041. doi:10.1523/JNEUROSCI.0220-13.2013.
6. Jung HY, Mickus T, Spruston N. Prolonged sodium channel inactivation contributes to dendritic action potential attenuation in hippocampal pyramidal neurons. *The Journal of neuroscience : the official journal of the Society for Neuroscience*. 1997;17(17):6639–46.

7. Bromm B, Frankenhaeuser B. Repetitive discharge of the excitable membrane computed on the basis of voltage clamp data for the node of Ranvier. *Pflügers Archiv: European Journal of Physiology*. 1972;332(1). doi:10.1007/BF00603811.
8. Frankenhaeuser B, Vallbo B. Accommodation in Myelinated Nerve Fibres of *Xenopus Laevis* as Computed on the Basis of Voltage Clamp Data. *Acta Physiologica Scandinavica*. 1965;63(1-2). doi:10.1111/j.1748-1716.1965.tb04037.x.
9. Crambert G, Hasler U, Beggah AT, Yu C, Modyanov NN, Horisberger JD, et al. Transport and Pharmacological Properties of Nine Different Human Na,K-ATPase Isozymes\*; 2000. Available from: <http://www.jbc.org/>.
10. Clausen MV, Hilbers F, Poulsen H. The Structure and Function of the Na,K-ATPase Isoforms in Health and Disease. *Frontiers in Physiology*. 2017;8:371. doi:10.3389/fphys.2017.00371.
11. Colbert CM, Magee JC, Hoffman DA, Johnston D. Slow recovery from inactivation of Na<sup>+</sup> channels underlies the activity- dependent attenuation of dendritic action potentials in hippocampal CA1 pyramidal neurons. *Journal of Neuroscience*. 1997;17(17). doi:10.1523/jneurosci.17-17-06512.1997.
12. Ermentrout B. Type I Membranes, Phase Resetting Curves, and Synchrony. *Neural Computation*. 1996;doi:10.1162/neco.1996.8.5.979.
13. Hesse J, Schleimer JH, Schreiber S. Qualitative changes in phase-response curve and synchronization at the saddle-node-loop bifurcation. *PHYSICAL REVIEW E*. 2017;95. doi:10.1103/PhysRevE.95.052203.
14. Marder E, Goaillard JM. Variability, compensation and homeostasis in neuron and network function. *Nature Reviews Neuroscience*. 2006;7(7):563–574. doi:10.1038/nrn1949.
15. Fleidervish IA, Friedman A, Gutnick MJ. Slow inactivation of Na current and slow cumulative spike adaptation in mouse and guinea-pig neocortical neurones in slices; 1996. Available from: <https://www.ncbi.nlm.nih.gov/pmc/articles/PMC1158952/pdf/jphysiol100289-0086.pdf>.
16. Hahn PJ, Durand DM. Bistability Dynamics in Simulations of Neural Activity in High-Extracellular-Potassium Conditions. *Journal of Computational Neuroscience*. 2001;11:5–18.

17. Aihara K, Matsumoto G. Two stable steady states in the Hodgkin-Huxley axons. *Biophysical journal*. 1983;41(1):87–9. doi:10.1016/S0006-3495(83)84408-7.
18. Krishnan GP, Filatov G, Shilnikov A, Bazhenov M. Electrogenic properties of the Na<sup>+</sup>/K<sup>+</sup> ATPase control transitions between normal and pathological brain states. *Journal of Neurophysiology*. 2015;doi:10.1152/jn.00460.2014.
19. Hübel N, Dahlem MA. Dynamics from Seconds to Hours in Hodgkin-Huxley Model with Time-Dependent Ion Concentrations and Buffer Reservoirs. *PLoS Computational Biology*. 2014;10(12). doi:10.1371/journal.pcbi.1003941.
20. Bazhenov M, Timofeev I, Steriade M, Sejnowski TJ. Potassium model for slow (2-3 Hz) in vivo neocortical paroxysmal oscillations. *Journal of Neurophysiology*. 2004;doi:10.1152/jn.00529.2003.
21. Barreto E, Cressman JR. Ion concentration dynamics as a mechanism for neuronal bursting. *Journal of Biological Physics*. 2011;37(3):361–373. doi:10.1007/s10867-010-9212-6.
22. Fröhlich F, Bazhenov M. Coexistence of tonic firing and bursting in cortical neurons. *Physical Review E*. 2006;74(3):031922. doi:10.1103/PhysRevE.74.031922.
23. Fink CG, Booth V, Zochowski M. Cellularly-driven differences in network synchronization propensity are differentially modulated by firing frequency. *PLoS Computational Biology*. 2011;7(5). doi:10.1371/journal.pcbi.1002062.
24. Y Kuramoto. Kuramoto, Y., *Chemical Oscillations, Waves, and Turbulence*. Springer-Verlag Berlin Heidelberg. 1984;doi:10.1007/978-3-642-69689-3.
25. LeBeau FEN, Towers SK, Traub RD, Whittington MA, Buhl EH. Fast network oscillations induced by potassium transients in the rat hippocampus in vitro. *Journal of Physiology*. 2002;doi:10.1113/jphysiol.2002.015933.
26. Bellot-Saez A, Cohen G, van Schaik A, Ooi L, W Morley J, Buskila Y. Astrocytic modulation of cortical oscillations. *Scientific Reports*. 2018;doi:10.1038/s41598-018-30003-w.
27. Hounsgaard J, Nicholson C. Potassium accumulation around individual purkinje cells in cerebellar slices from the guinea[U+2010]pig. *The Journal of Physiology*. 1983;doi:10.1113/jphysiol.1983.sp014767.

28. Pinsky PF, Rinzel J. Intrinsic and network rhythmogenesis in a reduced traub model for CA3 neurons. *Journal of Computational Neuroscience*. 1994;doi:10.1007/BF00962717.
29. Traub RD, Wong RKS. Cellular mechanism of neuronal synchronization in epilepsy. *Science*. 1982;216(4547). doi:10.1126/science.7079735.
30. Dichter MA, Ayala GF. Cellular mechanisms of epilepsy: A Status report. *Science*. 1987;237(4811). doi:10.1126/science.3037700.
31. Panayiotopoulos C. Reflex Seizures and Reflex Epilepsies. 2005;.
32. Kirst C, Ammer J, Felmy F, Herz A, Stemmler M. Fundamental Structure and Modulation of Neuronal Excitability: Synaptic Control of Coding, Resonance, and Network Synchronization. *bioRxiv*. 2015;doi:10.1101/022475.
33. Marder E. Variability, compensation, and modulation in neurons and circuits. *Proceedings of the National Academy of Sciences*. 2011;108(Supplement\_3):15542–15548. doi:10.1073/pnas.1010674108.
34. Arganda S, Guantes R, de Polavieja GG. Sodium pumps adapt spike bursting to stimulus statistics. *Nature Neuroscience*. 2007;10(11):1467–1473. doi:10.1038/nn1982.
35. Kofuji P, Newman EA. Potassium buffering in the central nervous system. *Neuroscience*. 2004;doi:10.1016/j.neuroscience.2004.06.008.
36. Dallérac G, Chever O, Rouach N. How do astrocytes shape synaptic transmission? Insights from electrophysiology. *Frontiers in cellular neuroscience*. 2013;7:159. doi:10.3389/fncel.2013.00159.
37. Fetziger AP, Ranck JB. Potassium accumulation in interstitial space during epileptiform seizures. *Experimental neurology*. 1970;26(3):571–85.
38. Rimmele TS, Rocher AB, Wellbourne-Wood J, Chatton JY. Control of Glutamate Transport by Extracellular Potassium: Basis for a Negative Feedback on Synaptic Transmission. *Cerebral Cortex*. 2017;27(6):3272–3283. doi:10.1093/cercor/bhx078.
39. Contreras D, Dürmüller N, Steriade M. Absence of a Prevalent Laminar Distribution of IPSPs in Association Cortical Neurons of Cat. *Journal of Neurophysiology*. 1997;78(5):2742–2753. doi:10.1152/jn.1997.78.5.2742.
40. Traub RD, Miles R. *Neuronal networks of the hippocampus*. Cambridge University Press; 1991. Available from: <https://dl.acm.org/citation.cfm?id=574330>.

41. Zandt BJ, ten Haken B, van Dijk JG, van Putten MJAM. Neural dynamics during anoxia and the "wave of death". PLoS ONE. 2011;6(7). doi:10.1371/journal.pone.0022127.
42. Doedel EJ, Champneys AR, Dercole F, Fairgrieve T, Kuznetsov Y, Oldeman B, et al.. AUTO-07P: Continuation and Bifurcation Software for Ordinary Differential Equations; 2008. Available from: <http://sourceforge.net/projects/auto-07p/>.
